# Supplementary material for: In-Depth Molecular Characterization of Neovascular Membranes Suggests a Role for Hyalocyte-to-Myofibroblast Transdifferentiation in Proliferative Diabetic Retinopathy
Source: PubMed Central journal article supplement (PMC8593213; doi:10.3389/fimmu.2021.757607), 2021-11-02
Supplement: Table_1.pdf [file Table_1.pdf]

Supplementary Table 1. Patients' characteristics.

| #  | Age (years) | Sex | DM Type | Ocular Diagnosis | Lens status  | Previous vitrectomy | Previous anti-VEGF treatment | Previous PRP treatment | Readout      |
|----|-------------|-----|---------|------------------|--------------|---------------------|------------------------------|------------------------|--------------|
| 1  | 40          | M   | I       | PDR              | phakic       | no                  | no                           | yes                    | RNA-Seq      |
| 2  | 35          | M   | I       | PDR              | phakic       | no                  | no                           | yes                    | RNA-Seq      |
| 3  | 29          | M   | I       | PDR              | phakic       | yes                 | > 3 months                   | yes                    | RNA-Seq      |
| 4  | 29          | F   | I       | PDR              | phakic       | no                  | no                           | no                     | RNA-Seq      |
| 5  | 56          | M   | II      | PDR              | phakic       | no                  | no                           | no                     | RNA-Seq      |
| 6  | 20          | F   | I       | PDR              | phakic       | no                  | no                           | yes                    | RNA-Seq      |
| 7  | 60          | M   | I       | PDR              | pseudophakic | no                  | > 3 months                   | yes                    | RNA-Seq      |
| 8  | 32          | F   | I       | PDR              | phakic       | no                  | no                           | yes                    | IHC          |
| 9  | 29          | F   | I       | PDR              | phakic       | no                  | 4 days prior to surgery      | yes                    | IHC          |
| 10 | 29          | M   | I       | PDR              | pseudophakic | yes                 | no                           | yes                    | IMC          |
| 11 | 58          | F   | II      | PDR              | phakic       | no                  | no                           | yes                    | IMC          |
| 12 | 45          | F   | II      | PDR              | phakic       | no                  | no                           | no                     | IMC          |
| 13 | 52          | F   | II      | PDR              | phakic       | no                  | no                           | yes                    | IMC          |
| 14 | 33          | M   | I       | PDR              | phakic       | no                  | > 3 months                   | yes                    | IMC          |
| 15 | 86          | M   | II      | PDR              | pseudophakic | no                  | no                           | yes                    | Cell culture |
| 16 | 52          | F   | I       | PDR              | phakic       | no                  | no                           | yes                    | Cell culture |
| 17 | 37          | M   | I       | PDR              | phakic       | no                  | > 3 months                   | yes                    | Cell culture |
| 18 | 73          | M   | II      | PDR              | phakic       | no                  | > 3 months                   | yes                    | Cell culture |
| 19 | 40          | F   | II      | PDR              | phakic       | no                  | > 3 months                   | yes                    | Cell culture |
| 20 | 71          | M   | -       | MP               | phakic       | no                  | no                           | no                     | RNA-Seq      |
| 21 | 83          | M   | -       | MP               | pseudophakic | no                  | no                           | no                     | RNA-Seq      |
| 22 | 79          | M   | -       | MP               | phakic       | no                  | no                           | no                     | RNA-Seq      |
| 23 | 66          | F   | -       | MP               | phakic       | no                  | no                           | no                     | RNA-Seq      |
| 24 | 72          | F   | -       | MP               | phakic       | no                  | no                           | no                     | RNA-Seq      |
| 25 | 62          | M   | -       | MP               | pseudophakic | no                  | no                           | no                     | RNA-Seq      |
| 26 | 62          | M   | -       | MP               | phakic       | no                  | no                           | no                     | RNA-Seq      |
| 27 | 75          | M   | -       | MP               | phakic       | no                  | no                           | no                     | RNA-Seq      |
| 28 | 70          | F   | -       | MP               | pseudophakic | no                  | no                           | no                     | RNA-Seq      |
| 29 | 69          | M   | -       | MP               | phakic       | no                  | no                           | no                     | RNA-Seq      |
| 30 | 77          | M   | -       | MP               | pseudophakic | no                  | no                           | no                     | IHC          |
| 31 | 77          | M   | -       | MP               | phakic       | no                  | no                           | no                     | IHC          |
| 32 | 64          | F   | -       | MP               | phakic       | no                  | no                           | no                     | IMC          |
| 33 | 68          | M   | -       | MP               | phakic       | no                  | no                           | no                     | IMC          |
| 34 | 74          | M   | -       | MP               | pseudophakic | no                  | no                           | no                     | IMC          |
| 35 | 65          | F   | -       | MH               | phakic       | no                  | no                           | no                     | RNA-Seq      |
| 36 | 69          | M   | -       | MH               | phakic       | no                  | no                           | no                     | RNA-Seq      |
| 37 | 79          | F   | -       | MH               | pseudophakic | no                  | no                           | no                     | RNA-Seq      |
| 38 | 67          | F   | -       | MH               | phakic       | no                  | no                           | no                     | RNA-Seq      |
| 39 | 67          | M   | -       | MH               | phakic       | no                  | no                           | no                     | RNA-Seq      |
| 40 | 61          | F   | -       | MH               | phakic       | no                  | no                           | no                     | RNA-Seq      |
| 41 | 66          | F   | II      | MH               | pseudophakic | no                  | no                           | no                     | RNA-Seq      |
| 42 | 80          | F   | -       | MH               | pseudophakic | no                  | no                           | no                     | IHC          |
| 43 | 77          | F   | -       | MH               | pseudophakic | no                  | no                           | no                     | IHC          |

DM, diabetes mellitus. VEGF, vascular endothelial growth factor. PRP, panretinal photocoagulation. PDR, proliferative diabetic retinopathy. MP, macular pucker. MH, macular hole. IHC, immunohistochemistry. IMC, Imaging Mass Cytometry.
