# Supplementary material for: In-Depth Molecular Characterization of Neovascular Membranes Suggests a Role for Hyalocyte-to-Myofibroblast Transdifferentiation in Proliferative Diabetic Retinopathy
Source: PubMed Central journal article supplement (PMC8593213; doi:10.3389/fimmu.2021.757607), 2021-11-02
Supplement: Table_2.pdf [file Table_2.pdf]

**Supplementary Table 2. Antibodies, respective clones and conjugated metals for Imaging Mass Cytometry Analysis.**

| <b>Target</b>   | <b>Clone</b> | <b>Metal</b> |
|-----------------|--------------|--------------|
| α-SMA           | 1A4          | 141Pr        |
| EGFR            | D38B1        | 142Nd        |
| Vimentin        | D21H3        | 143Nd        |
| CD16            | EPR16784     | 146Nd        |
| CD163           | EDHu-1       | 147Sm        |
| Pan-Keratin     | C11          | 148Nd        |
| CD11b           | EPR1344      | 149Sm        |
| CD274 (PD-L1)   | SP142        | 150Nd        |
| CD31 (PECAM-1)  | EPR3094      | 151Eu        |
| CD45            | D9M8I        | 152Sm        |
| CD44            | IM7          | 153Eu        |
| β-Actin         | 2F1-1        | 154Sm        |
| E-Cadherin      | 2,40E+11     | 158Gd        |
| CD68            | KP1          | 159Tb        |
| CD8a            | C8/144B      | 162Dy        |
| VEGF            | G153-694     | 163Dy        |
| Arginase 1      | D4E3M        | 164Dy        |
| CD74            | LN2          | 166Er        |
| Granzyme B      | EPR20129-217 | 167Er        |
| Ki-67           | B56          | 168Er        |
| Collagen type I | Polyclonal   | 169Tm        |
| Histone H3      | D1H2         | 171Yb        |
| CD276 (B7-H3)   | Polyclonal   | 173Yb        |
| HLA-DR          | LN3          | 174Yb        |
| Pan-Actin       | D18C11       | 175Lu        |
| Nucleic Acid    |              | 191Ir/193Ir  |
